# Supplementary material
Source: publisher site journal article supplement (https://www.dovepress.com/article/213677)
Supplement: Supplementary file 1 [file get_supplementary_file.php]

## Supplementary Files

**Table S1.** Search terms and retrieval records

**Table S2.** Summary of diagnostic performance of fecal occult blood test according to anatomical location of colorectal cancer

**Table S3.** Summary of diagnostic performance of fecal occult blood test according to anatomical location of advanced adenomas

**Table S4.** Summary of diagnostic performance of fecal occult blood test according to anatomical location of advanced neoplasms

Table S1. Search terms and retrieval records

| Search | Term                          | PubMed | Embase | Cochrane Library | Wed of Science |
|--------|-------------------------------|--------|--------|------------------|----------------|
| 1      | Colorectal                    | 7844   | 11229  | 2254             | 13102          |
| 2      | colon                         | 5355   | 11152  | 1288             | 9337           |
| 3      | rectum                        | 1053   | 5593   | 505              | 1445           |
| 4      | 1 or 2 or 3                   | 11955  | 21833  | 3413             | 19782          |
| 5      | cancer                        | 103476 | 150784 | 18299            | 126973         |
| 6      | neoplasm                      | 17297  | 14308  | 1419             | 65159          |
| 7      | carcinoma                     | 19155  | 34083  | 4327             | 40011          |
| 8      | adenoma                       | 1482   | 3054   | 356              | 2552           |
| 9      | malignancy                    | 20060  | 9521   | 661              | 12208          |
| 10     | 5 or 6 or 7 or 8 or 9         | 111786 | 159934 | 20319            | 159930         |
| 11     | faecal immunochemical test    | 36     | 32     | 33               | 41             |
| 12     | fecal immunochemical testing  | 31     | 33     | 15               | 123            |
| 13     | fecal immunochemical test     | 80     | 87     | 33               | 123            |
| 14     | faecal immunochemical testing | 5      | 7      | 15               | 41             |
| 15     | faecal occult blood test      | 41     | 47     | 64               | 57             |
| 16     | fecal occult blood test       | 76     | 149    | 64               | 143            |
| 17     | 11or 12or13or14or15or16       | 186    | 217    | 84               | 270            |
| 18     | detection                     | 33085  | 36383  | 2520             | 70115          |
| 19     | screening                     | 79675  | 35363  | 8525             | 46833          |
| 20     | detecting                     | 6464   | 6614   | 614              | 88455          |
| 21     | diagnosis                     | 76323  | 130174 | 10447            | 94154          |
| 22     | 18or19or20or21                | 121219 | 177860 | 21813            | 244822         |
| 23     | 4and10and17and22              | 160    | 179    | 68               | 224            |

((((Colorectal) OR colon) OR rectum)) AND ("2018/8/17"[Publication Date] : "3000"[Publication Date])

Published before August 17<sup>th</sup> 2018

Table S2. Summary of diagnostic performance of fecal occult blood test according to anatomical location of colorectal cancer

| Ref.             | Author, year                | Brand <sup>a</sup> | Cut-off   | Proximal colorectal cancer |                      |          | Distal colorectal cancer |                      | Free of neoplasms |                      |          | <i>P</i> -value <sup>b</sup> |
|------------------|-----------------------------|--------------------|-----------|----------------------------|----------------------|----------|--------------------------|----------------------|-------------------|----------------------|----------|------------------------------|
|                  |                             |                    |           | Pos. /N                    | Sensitivity (95% CI) | (95% CI) | Pos. /N                  | Sensitivity (95% CI) | Neg. /N           | Specificity (95% CI) | (95% CI) |                              |
| <b>(a) gFOBT</b> |                             |                    |           |                            |                      |          |                          |                      |                   |                      |          |                              |
| 15               | Thomas, 1992                | 3                  | N.A.      | 5/10                       | 50.0 (23.7-76.3)     |          | 24/40                    | 60.0 (44.6-73.7)     | 248/261           | 95.0 (91.7-97.1)     |          | 0.83                         |
| 16               | Hope, 1996                  | 4                  | N.A.      | 1/1                        | 100 (20.7-100)       |          | 2/2                      | 100 (34.2-100)       | 118/136           | 86.8 (80.0-91.5)     |          | 1                            |
| 20               | Sung, 2003                  | 4                  | N.A.      | 1/1                        | 100 (20.7-100)       |          | 0/3                      | 0                    | 320/399           | 80.2 (76.0-83.8)     |          | 0.25                         |
| 26               | Bjerregaard,2009            | 5                  | N.A.      | 2/4                        | 50.0 (15.0-85.0)     |          | 4/4                      | 100 (51.0-100)       | 165/206           | 80.1 (74.1-85.0)     |          | 0.43                         |
| 31               | Park, 2010                  | 4                  | N.A.      | 3/11                       | 27.3 (9.7-56.6)      |          | 1/2                      | 50.0 (9.4-90.6)      | 444/479           | 92.7 (90.0-94.7)     |          | 1                            |
| 39               | Lee, 2013                   | 5                  | N.A.      | 17/21                      | 81.0 (60.0-92.3)     |          | 17/18                    | 94.4 (74.2-99.0)     | 2637/2965         | 88.9 (87.8-90.0)     |          | 0.35                         |
| <b>(b) iFOBT</b> |                             |                    |           |                            |                      |          |                          |                      |                   |                      |          |                              |
| 15               | Thomas, 1992                | 2                  | N.A.      | 9/10                       | 90.0 (59.6-98.2)     |          | 38/40                    | 95.0 (83.5-98.6)     | 213/261           | 81.6 (76.5-85.8)     |          | 0.5                          |
| 16               | Hope, 1996                  | 12                 | N.A.      | 1/1                        | 100 (20.7-100)       |          | 2/2                      | 100 (34.2-100)       | 131/136           | 96.3 (91.7-98.4)     |          | 1                            |
| 19               | Nakama, 2006                | 13                 | N.A.      | 4/8                        | 50.0 (21.5-78.5)     |          | 35/56                    | 62.5 (49.4-74.0)     | 9023/9569         | 94.3 (93.8-94.7)     |          | 0.77                         |
| 21               | Young, 2003(1) <sup>c</sup> | 1                  | N.A.      | 6/8                        | 75.0 (40.9-92.9)     |          | 23/28                    | 82.1 (64.4-92.1)     | 262/277           | 94.6 (91.3-96.7)     |          | 1                            |
| 21               | Young, 2003(2) <sup>c</sup> | 6                  | N.A.      | 6/8                        | 75.0 (40.9-92.9)     |          | 21/28                    | 75.0 (56.6-87.3)     | 262/277           | 94.6 (91.3-96.7)     |          | 1                            |
| 22               | Morikawa, 2005              | 14                 | 20 ng/ml  | 13/23                      | 56.5 (36.3-76.8)     |          | 39/56                    | 69.6 (57.6-81.7)     | 16698/17480       | 95.5 (95.2-95.8)     |          | 0.26                         |
| 23               | Nakazato, 2006              | N.A.               | N.A.      | 3/7                        | 42.9 (15.8-75.0)     |          | 7/12                     | 58.3 (32.0-80.7)     | 2421/2765         | 87.6 (86.3-88.7)     |          | 0.65                         |
| 25               | Shastri, 2008               | 11                 | N.A.      | 15/21                      | 71.4 (50.0-86.2)     |          | 24/34                    | 70.6 (53.8-83.2)     | 497/516           | 96.3 (94.3-97.6)     |          | 0.95                         |
| 30               | Oono, 2010                  | 7                  | 100 ng/ml | 19/28                      | 67.9 (49.3-82.1)     |          | 49/63                    | 77.8 (66.1-86.3)     | 679/758           | 89.6 (87.2-91.6)     |          | 0.32                         |
| 31               | Park, 2010                  | 23                 | 100 ng/ml | 10/11                      | 90.9 (62.3-98.4)     |          | 1/2                      | 50.0 (9.4-90.6)      | 444/479           | 92.7 (90.0-94.7)     |          | 0.30                         |
| 34               | De Wijkerslooth, 2012       | 10                 | 50 ng/ml  | 2/2                        | 100 (34.2-100)       |          | 5/6                      | 83.3 (43.7-97.0)     | 1061/1135         | 93.5 (91.9-94.8)     |          | 1                            |
| 36               | Chiu, 2013                  | 9                  | 50 ng/ml  | 8/11                       | 72.7 (39.3-92.7)     |          | 14/17                    | 82.3 (55.8-95.3)     | 13500/14252       | 94.7 (94.3-95.1)     |          | 0.89                         |
| 37               | Kaul, 2013                  | 9                  | 40 ng/ml  | 9/9                        | 100 (70.1-100)       |          | 8/8                      | 100 (67.6-100)       | 83/96             | 86.5 (78.2-91.9)     |          | 1                            |
| 38               | Koga, 2013                  | 8                  | 50 ng/ml  | 55/85                      | 64.7 (54.1-74.0)     |          | 16/32                    | 50.0 (33.6-66.4)     | 105/107           | 98.1 (93.4-99.5)     |          | 0.15                         |
| 39               | Lee, 2013                   | 10                 | 100 ng/ml | 15/21                      | 71.4 (50.0-86.2)     |          | 17/18                    | 94.4 (74.2-99.0)     | 2900/2965         | 97.8 (97.2-98.3)     |          | 0.10                         |
| 40               | Kim, 2014                   | 10                 | 100 ng/ml | 24/46                      | 52.2 (38.1-65.9)     |          | 70/129                   | 54.3 (45.7-62.6)     | 150/151           | 99.3 (96.3-99.9)     |          | 0.81                         |
| 41               | Imperiale, 2014             | 24                 | 100 ng/ml | 20/30                      | 66.7 (48.8-80.8)     |          | 28/35                    | 80.0 (64.1-90.0)     | 6033/6281         | 96.1(95.5-96.5)      |          | 0.35                         |
| 43               | Kim, 2016                   | 10                 | 20 µg/g   | 11/17                      | 64.7 (38.3-85.8)     |          | 40/48                    | 83.3 (69.8-92.5)     | 3006/3566         | 84.3 (83.1-85.5)     |          | 0.21                         |
| 44               | Brenner, 2017               | 17                 | 100 ng/ml | 5/5                        | 100 (56.6-100)       |          | 23/24                    | 95.8 (79.8-99.3)     | 2245/2397         | 93.7 (92.6-94.6)     |          | 1                            |

<sup>a</sup> 1= FlexSure OBT; 2= HemeSelect; 3= Hemocult blood; 4= Hemocult blood II; 5= Hemocult blood Sensa; 6= InSure; 7= Hemo Techt NS-Plus; 8= OC-Hemocatch; 9= OC-Light; 10= OC-Sensor; 11= PreventID-CC; 12= Monohaem; 13= Imdia-HemSp; 14= Magstream 1000/Hem SP automated system; 15= RIDASCREEN haemoglobin; 16= Hemocult blood ICT; 17=Sentinel Diagnostics; 18= Bionexia FOBplus; 19= Bionexia Hb/Hp Complex; 20= ImmoCARE-C; 21= FOB advanced; 22= QuickVue iFOB; 23=OC-SENSA MICRO; 24=OC FIT-CHEK.

<sup>b</sup> *P*-values were calculated by chi-square test to compare the sensitivities for detecting proximal vs. distal colorectal cancers.

Abbreviation: CI, confidence intervals; Pos. , positive; Neg. , negative.

<sup>c</sup> Ordinal numbers were applied to mark the studies which contain variable FOBT brands

Table S3. Summary of diagnostic performance of fecal occult blood test according to anatomical location of advanced adenomas

| Ref.             | Author                       | Brand <sup>a</sup> | Cut-off   | Proximal advanced adenomas |                     | Distal advanced adenomas |                     | Free of neoplasms |                     | P-value <sup>b</sup> |
|------------------|------------------------------|--------------------|-----------|----------------------------|---------------------|--------------------------|---------------------|-------------------|---------------------|----------------------|
|                  |                              |                    |           | Pos. /N                    | Sensitivity (95%CI) | Pos./N                   | Sensitivity (95%CI) | Neg./N            | specificity (95%CI) |                      |
| <b>(a) gFOBT</b> |                              |                    |           |                            |                     |                          |                     |                   |                     |                      |
| 16               | Hope, 1996                   | 4                  | N.A.      | 3/11                       | 27.3 (9.7-56.6)     | 3/10                     | 30.0 (10.8-60.3)    | 118/136           | 86.8 (80.0-91.5)    | 1                    |
| 20               | Sung, 2003                   | 4                  | N.A.      | 10/51                      | 19.6 (11.0-32.5)    | 17/75                    | 22.7 (14.7-33.3)    | 320/399           | 80.2 (76.0-83.8)    | 0.68                 |
| 28               | Hundt, 2009                  | 3                  | N.A.      | 15/248                     | 6.1 (2.8-11.3)      | 6/140                    | 4.2 (1.7-8.4)       | 851/887           | 95.9 (94.4-97.1)    | 0.46                 |
| 31               | Park, 2010                   | 4                  | N.A.      | 7/33                       | 21.2 (10.7-37.8)    | 1/26                     | 3.8 (0.7-18.9)      | 444/479           | 92.7 (90.0-94.7)    | 0.12                 |
| <b>(b) iFOBT</b> |                              |                    |           |                            |                     |                          |                     |                   |                     |                      |
| 16               | Hope, 1996                   | 12                 | N.A.      | 6/11                       | 54.5 (28.0-78.7)    | 5/10                     | 50.0 (23.7-76.3)    | 131/136           | 96.3 (91.7-98.4)    | 1                    |
| 22               | Morikawa, 2005               | 14                 | 20 ng/ml  | 29/204                     | 14.2 (10.1-19.7)    | 116/444                  | 26.1 (22.3-30.4)    | 16698/17480       | 95.5 (95.2-95.8)    | <0.01                |
| 23               | Nakazato, 2006               | N.A.               | N.A.      | 6/34                       | 17.6 (8.3-33.5)     | 7/19                     | 36.8 (19.1-59.0)    | 2421/2765         | 87.6 (86.3-88.7)    | 0.22                 |
| 25               | Shastri, 2008                | 11                 | N.A.      | 6/12                       | 50.0 (25.4-74.6)    | 4/9                      | 44.4 (18.9-73.3)    | 497/516           | 96.3 (94.3-97.6)    | 1                    |
| 28 <sup>c</sup>  | Hundt, 2009 (1) <sup>d</sup> | 18                 | 40ng/ml   | 45/156                     | 28.9 (21.9-36.6)    | 61/174                   | 35.1 (28.0-42.6)    | 749/914           | 81.9 (79.3-84.4)    | 0.23                 |
| 28 <sup>c</sup>  | Hundt, 2009 (2) <sup>d</sup> | 19                 | 25ng/ml   | 79/156                     | 50.6 (42.5-58.7)    | 104/174                  | 59.8 (52.2-67.1)    | 537/914           | 58.8 (55.5-62.0)    | 0.01                 |
| 28 <sup>c</sup>  | Hundt, 2009 (3) <sup>d</sup> | 11                 | 10ng/ml   | 32/156                     | 20.5 (14.5-27.7)    | 55/174                   | 31.6 (24.8-39.1)    | 748/914           | 81.8 (79.2-84.3)    | 0.02                 |
| 28 <sup>c</sup>  | Hundt, 2009 (4) <sup>d</sup> | 20                 | 50ng/ml   | 8/156                      | 5.1 (2.2-9.9)       | 22/174                   | 12.6 (8.1-18.5)     | 884/914           | 96.7 (95.4-97.7)    | 0.02                 |
| 28 <sup>c</sup>  | Hundt, 2009 (5) <sup>d</sup> | 21                 | 40ng/ml   | 17/156                     | 10.9 (6.5-16.9)     | 33/174                   | 19.0 (13.4-25.6)    | 849/914           | 92.9 (91.0-94.5)    | 0.04                 |
| 28 <sup>c</sup>  | Hundt, 2009 (6) <sup>d</sup> | 22                 | 50ng/ml   | 67/156                     | 43.0 (35.1-51.1)    | 74/174                   | 42.5 (35.1-50.2)    | 642/914           | 70.2 (67.2-73.2)    | 0.94                 |
| 29               | Haug, 2010                   | 15                 | 2 µg/g    | 30/156                     | 19.1 (13.3-26.1)    | 47/174                   | 27.0 (20.6-34.3)    | 819/914           | 89.6 (87.4-91.5)    | 0.10                 |
| 31               | Park, 2010                   | 23                 | 100 ng/ml | 18/33                      | 56.3 (38.0-70.2)    | 2/26                     | 7.7 (2.1-24.1)      | 444/479           | 92.7 (90.0-94.7)    | <0.01                |
| 33               | Khalid-de Bakker, 2011       | 10                 | 50 ng/ml  | 0/10                       | 0                   | 6/28                     | 21.4 (8.3-41.0)     | 235/243           | 96.7 (93.6-98.6)    | 0.29                 |
| 36               | Chiu, 2013                   | 9                  | 50 ng/ml  | 65/289                     | 22.5 (17.9-27.8)    | 97/307                   | 31.6 (26.5-37.2)    | 13500/14252       | 94.7 (94.3-95.1)    | 0.01                 |
| 43               | Kim, 2016                    | 10                 | 20 µg/g   | 48/151                     | 31.6 (24.5-39.5)    | 70/162                   | 43.1 (35.6-50.8)    | 3006/3566         | 84.3 (83.1-85.5)    | 0.04                 |
| 44               | Brenner, 2017                | 17                 | 100 ng/ml | 17/118                     | 14.4 (9.2-21.9)     | 93/214                   | 43.5 (37.0-50.2)    | 2245/2397         | 93.7 (92.6-94.6)    | <0.01                |
| 45               | Jung, 2018                   | 10                 | 100 ng/ml | 13/111                     | 11.7 (7.0-19.0)     | 35/180                   | 19.4 (14.3-25.8)    | 9314/9575         | 97.3 (96.9-97.6)    | 0.12                 |

<sup>a</sup> 1= FlexSure OBT; 2= HemeSelect; 3= Hemoccult blood; 4= Hemoccult blood II; 5= Hemoccult blood Sensa; 6= InSure; 7= Hemo Techt NS-Plus; 8= OC-Hemocatch; 9= OC-Light; 10= OC-Sensor; 11= PreventID-CC; 12= MonoHaem; 13= Imdia-HemSp; 14= Magstream 1000/Hem SP automated system; 15= RIDASCREEN haemoglobin; 16= Hemoccult blood ICT; 17= Sentinel Diagnostics; 18= Bionexia FOBplus; 19= Bionexia Hb/Hp Complex; 20= ImmoCARE-C; 21= FOB advanced; 22= QuickVue iFOB;

23=OC-SENSA MICRO; 24=OC FIT-CHEK.

<sup>b</sup> *P*-values were calculated by chi-square test to compare the sensitivities for detecting proximal vs. distal advanced adenomas.

<sup>c</sup> all cases of adenomas were calculated.

Abbreviation: CI, confidence intervals; Pos. , positive; Neg. , negative.

<sup>d</sup> Ordinal numbers were applied to mark the studies which contain variable FOBT brands

Table S4. Summary of diagnostic performance of fecal occult blood test according to anatomical location of advanced neoplasms

| Ref              | Author, year                   | Brand <sup>a</sup> | Cut-off   | Proximal advanced neoplasms |                     | Distal advanced neoplasms |                     | Free of neoplasms |                     | P-value <sup>b</sup> |
|------------------|--------------------------------|--------------------|-----------|-----------------------------|---------------------|---------------------------|---------------------|-------------------|---------------------|----------------------|
|                  |                                |                    |           | Pos./N                      | Sensitivity (95%CI) | Pos./N                    | Sensitivity (95%CI) | Neg./N            | Specificity (95%CI) |                      |
| <b>(a) gFOBT</b> |                                |                    |           |                             |                     |                           |                     |                   |                     |                      |
| 16               | Hope, 1996                     | 4                  | N.A.      | 4/12                        | 33.3 (13.8-60.9)    | 5/12                      | 41.7 (19.3-68.0)    | 100/118           | 84.7 (77.1-90.1)    | 1                    |
| 18               | Lieberman, 2010                | 4                  | N.A.      | 32/137                      | 23.4 (17.1-31.1)    | 41/169                    | 24.3 (18.4-31.2)    | 1680/1791         | 93.8 (92.6-94.8)    | 0.85                 |
| 20               | Sung, 2001                     | 4                  | N.A.      | 11/52                       | 21.1 (12.2-34.0)    | 17/78                     | 21.8 (14.1-32.2)    | 320/399           | 80.2 (76.0-83.8)    | 0.93                 |
| 24               | Ahlquist, 2008(1) <sup>c</sup> | 3                  | N.A.      | 4/56                        | 7.1 (2.8-17.0)      | 13/101                    | 12.9 (7.7-20.8)     | 1838/1871         | 98.2 (97.5-98.7)    | 0.27                 |
| 24               | Ahlquist, 2008(2)              | 5                  | N.A.      | 6/56                        | 10.7 (5.0-21.5)     | 27/101                    | 26.7 (19.1-36.1)    | 1810/1871         | 96.7 (95.8-97.5)    | 0.02                 |
| 27               | Graser, 2009                   | N.A.               | N.A.      | 1/4                         | 25.0 (4.6-69.9)     | 4/19                      | 21.1 (8.5-43.3)     | 166/177           | 93.8 (89.2-96.5)    | 1                    |
| 31               | Park, 2009                     | 4                  | N.A.      | 10/44                       | 22.7 (12.8-37.0)    | 2/28                      | 7.1 (2.0-22.7)      | 444/479           | 92.7 (90.0-94.7)    | 0.08                 |
| 35               | Wong, 2012                     | 4                  | N.A.      | 0/17                        | 0                   | 5/51                      | 9.8 (1.6-18.0)      | 994/1006          | 98.8 (98.1-99.5)    | 0.42                 |
| <b>(b) iFOBT</b> |                                |                    |           |                             |                     |                           |                     |                   |                     |                      |
| 16               | Hope, 1996                     | 12                 | N.A.      | 7/12                        | 58.3 (32.0-80.7)    | 7/12                      | 58.3 (32.0-80.7)    | 131/136           | 96.3 (91.7-98.4)    | 1                    |
| 17               | Greenberg, 2000                | 1                  | N.A.      | 5/18                        | 27.8 (12.5-50.9)    | 20/34                     | 58.8 (42.2-73.6)    | 341/390           | 87.4 (83.8-90.4)    | 0.03                 |
| 22               | Morikawa, 2005                 | 14                 | 20 ng/ml  | 29/178                      | 16.3 (11.3-21.3)    | 169/549                   | 30.7 (26.7-34.8)    | 16698/17480       | 95.5 (95.2-95.8)    | <0.01                |
| 23               | Nakazato, 2006                 | N.A.               | N.A.      | 9/41                        | 22.0 (12.0-36.7)    | 14/31                     | 45.2 (29.2-62.2)    | 2421/2765         | 87.6 (86.2-88.7)    | 0.04                 |
| 25               | Shastri, 2008                  | 11                 | N.A.      | 21/33                       | 63.6 (46.6-77.8)    | 28/43                     | 65.1 (50.2-77.6)    | 497/516           | 96.3 (94.3-97.6)    | 0.89                 |
| 27               | Graser, 2009                   | 17                 | 14 ng/ml  | 1/4                         | 25.0 (4.6-69.9)     | 6/18                      | 33.3 (16.3-56.3)    | 163/183           | 89.1 (83.7-92.8)    | 1                    |
| 31               | Park, 2010                     | 23                 | 100 ng/ml | 28/44                       | 63.6 (48.9-76.2)    | 3/28                      | 10.7 (3.7-27.2)     | 444/479           | 92.7 (90.0-94.7)    | <0.01                |
| 32               | Haug, 2011                     | 15                 | 2 µg/g    | 21/71                       | 29.5 (20.2-41.0)    | 69/157                    | 43.9 (36.4-51.8)    | 1832/2082         | 88.0 (86.6-89.4)    | 0.04                 |
| 34               | De Wijkerslooth, 2012          | 10                 | 50 ng/ml  | 9/24                        | 37.5 (21.2-57.3)    | 31/83                     | 37.3 (27.7-48.1)    | 1061/1135         | 93.5 (91.9-94.1)    | 0.99                 |
| 35               | Wong, 2012(1) <sup>c</sup>     | 14                 | 20 ng/ml  | 3/17                        | 17.6 (6.2-41.0)     | 22/51                     | 43.1 (29.5-56.7)    | 938/1006          | 93.2 (91.7-94.8)    | 0.06                 |
| 35               | Wong, 2012(2) <sup>c</sup>     | 16                 | N.A.      | 2/17                        | 11.8 (3.3-27.1)     | 14/51                     | 27.5 (15.2-39.7)    | 964/1006          | 95.8 (94.6-97.1)    | 0.32                 |
| 36               | Chiu, 2013                     | 9                  | 50 ng/ml  | 72/299                      | 24.1 (19.4-29.4)    | 111/324                   | 34.3 (29.2-39.7)    | 13500/14252       | 94.7 (94.3-95.1)    | <0.01                |
| 42               | Castro, 2013                   | 10                 | 20 µg/g   | 8/47                        | 17.0 (8.1-31.3)     | 49/115                    | 42.6 (34.0-51.7)    | 1096/1129         | 97.1 (95.9-97.9)    | <0.01                |
| 43               | Kim, 2016                      | 10                 | 20 µg/g   | 55/168                      | 32.7 (25.7-40.4)    | 103/210                   | 49.0 (42.1-56.0)    | 3006/3566         | 84.3 (83.1-85.5)    | <0.01                |
| 44               | Brenner, 2017                  | 17                 | 100 ng/ml | 22/123                      | 17.9 (12.1-25.6)    | 116/238                   | 48.7 (42.5-55.1)    | 2245/2397         | 93.7 (92.6-94.6)    | <0.01                |
| 45               | Jung, 2018                     | 10                 | 100 ng/ml | 15/114                      | 13.2 (8.1-20.6)     | 40/188                    | 21.3 (16.0-27.7)    | 9314/9575         | 97.3 (96.9-97.6)    | 0.08                 |

<sup>a</sup> 1= FlexSure OBT; 2= HemeSelect; 3= Hemoccult blood; 4= Hemoccult blood II; 5= Hemoccult blood Sensa; 6= InSure; 7= Hemo Techt NS-Plus; 8= OC-Hemocatch;

9= OC-Light; 10= OC-Sensor; 11= PreventID-CC; 12= Monohaem; 13= Imdia-HemSp; 14= Magstream 1000/Hem SP automated system; 15= RIDASCREEN haemoglobin; 16= Hemocult blood ICT; 17=Sentinel Diagnostics; 18= Bionexia FOBplus; 19= Bionexia Hb/Hp Complex; 20= ImmoCARE-C; 21= FOB advanced; 22= QuickVue iFOB; 23=OC-SENSA MICRO; 24=OC FIT-CHEK.

<sup>b</sup> *P*-values were calculated by chi-square test to compare the sensitivities for detecting proximal vs. distal advanced adenomas.

Abbreviation: CI, confidence intervals; Pos. , positive; Neg. , negative

<sup>c</sup> Ordinal numbers were applied to mark the studies which contain variable FOBT brands



## Legends of supplementary Figures

**Figure S1a.** Subgroup analysis of pooled sensitivities of immunochemical fecal occult blood test (iFOBT) on detection of proximal and distal colorectal cancer, according to type of iFOBT brand, a) for detecting proximal colorectal cancer in studies with qualitative iFOBT; b) for detecting distal colorectal cancer in studies with qualitative iFOBT; c) for detecting proximal colorectal cancer in studies with quantitative iFOBT; d) for detecting distal colorectal cancer in studies with quantitative iFOBT. **Note:** <sup>a</sup> Ordinal numbers were applied to mark the studies which contain variable FOBT brands. **Abbreviation:** iFOBT, immunochemical fecal occult blood testing.

**Figure S2a.** Subgroup analysis of pooled sensitivities of immunochemical fecal occult blood test (iFOBT) on detection of proximal and distal advanced adenoma, according to type of iFOBT brand, a) for detecting proximal advanced adenoma in studies with qualitative iFOBT; b) for detecting distal advanced adenoma in studies with qualitative iFOBT; c) for detecting proximal advanced adenoma in studies with quantitative iFOBT; d) for detecting distal advanced adenoma in studies with quantitative iFOBT. **Note:** <sup>a</sup> Ordinal numbers were applied to mark the studies which contain variable FOBT brands. **Abbreviation:** iFOBT, immunochemical fecal occult blood testing.

**Figure S3a.** Subgroup analysis of pooled sensitivities of immunochemical fecal occult blood test (iFOBT) on detection of proximal and distal advanced neoplasia, according to type of iFOBT brand, a) for detecting proximal advanced neoplasia in studies with qualitative iFOBT; b) for detecting distal advanced neoplasia in studies with qualitative iFOBT; c) for detecting proximal advanced neoplasia in studies with quantitative iFOBT; d) for detecting distal advanced neoplasia in studies with quantitative iFOBT. **Note:** <sup>a</sup> Ordinal numbers were applied to mark the studies which contain variable FOBT brands. **Abbreviation:** iFOBT, immunochemical fecal occult blood testing.

**Figure S1b.** Subgroup analysis of pooled sensitivities of immunochemical fecal occult blood test (iFOBT) on detection of proximal and distal colorectal cancer, according to type of study setting, a) for detecting proximal colorectal cancer in studies with clinical setting; b) for detecting distal colorectal cancer in studies with clinical setting; c) for detecting proximal colorectal cancer in studies with screening setting; d) for detecting distal colorectal cancer in studies with screening setting. **Note:** <sup>a</sup> Ordinal numbers were applied to mark the studies which contain variable FOBT brands. **Abbreviation:** iFOBT, immunochemical fecal occult blood testing.

**Figure S2b.** Subgroup analysis of pooled sensitivities of immunochemical fecal

occult blood test (iFOBT) on detection of proximal and distal colorectal cancer, according to type of study setting, a) for detecting proximal advanced adenomas in studies with screening setting; b) for detecting distal advanced adenomas in studies with screening setting. **Note:** <sup>a</sup> Ordinal numbers were applied to mark the studies which contain variable FOBT brands. **Abbreviation:** iFOBT, immunochemical fecal occult blood testing.

**Figure S3b.** Subgroup analysis of pooled sensitivities of immunochemical fecal occult blood test (iFOBT) on detection of proximal and distal advanced neoplasia, according to type of study setting, a) for detecting proximal advanced neoplasia in studies with clinical setting; b) for detecting distal advanced neoplasia in studies with clinical setting; c) for detecting proximal advanced neoplasia in studies with screening setting; d) for detecting distal advanced neoplasia in studies with screening setting. **Note:** <sup>a</sup> Ordinal numbers were applied to mark the studies which contain variable FOBT brands. **Abbreviation:** iFOBT, immunochemical fecal occult blood testing.

**Figure S4.** Funnel plots by detection methods and outcomes, a) for testing publication bias of detecting colorectal cancer by using guaiac-fecal occult blood test; b) for testing publication bias of detecting colorectal cancer by using immunochemical fecal occult blood test; c) for testing publication bias of detecting advanced adenoma by using guaiac-fecal occult blood test; d) for testing publication bias of detecting advanced adenoma by using immunochemical fecal occult blood test; e) for testing publication bias of detecting advanced neoplasia by using guaiac-occult blood test; f) for testing publication bias of detecting advanced neoplasia by using immunochemical fecal occult blood test.

**Figure S5.** Methodological quality graph of risk of bias and applicability concerns

**Figure S6.** Risk of bias and applicability concerns summary

(A) qualitative iFOBT for colorectal cancer of proximal colon

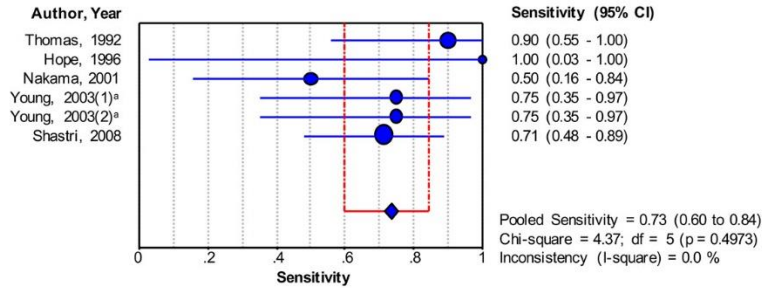

(B) qualitative iFOBT for colorectal cancer of distal colon/rectum

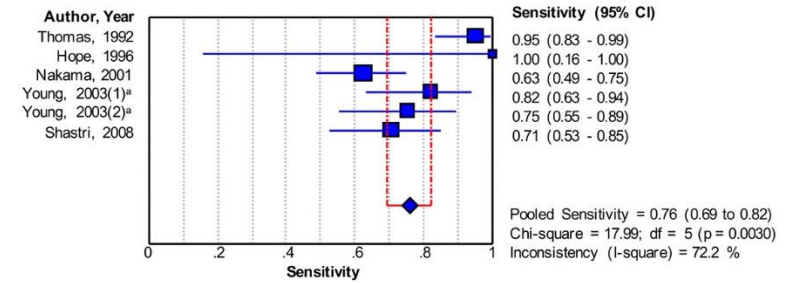

(C) quantitative iFOBT for colorectal cancer of proximal colon

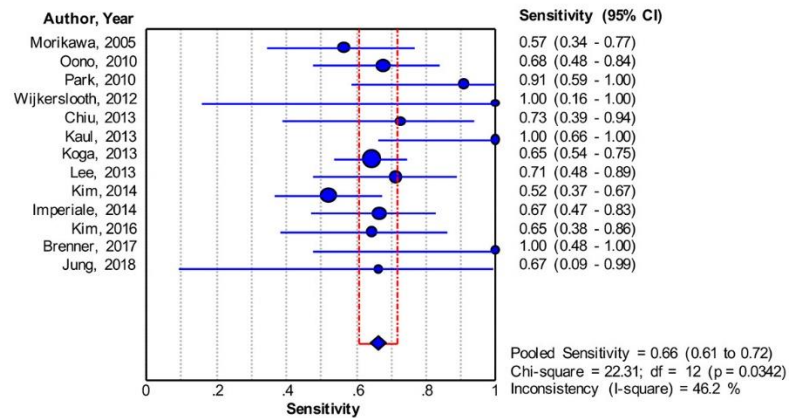

(D) quantitative iFOBT for colorectal cancer of distal colon/rectum

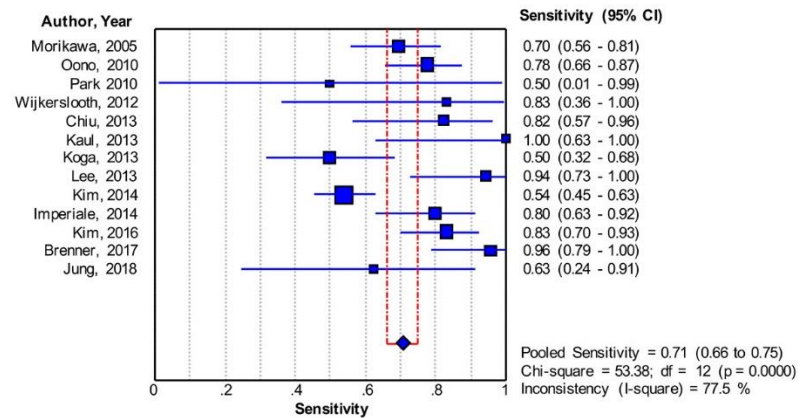

(A) qualitative iFOBT for advanced adenomas of proximal colon

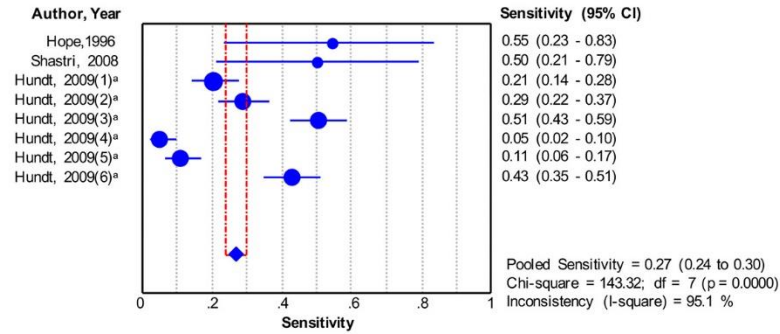

(B) qualitative iFOBT for advanced adenomas of distal colon/rectum

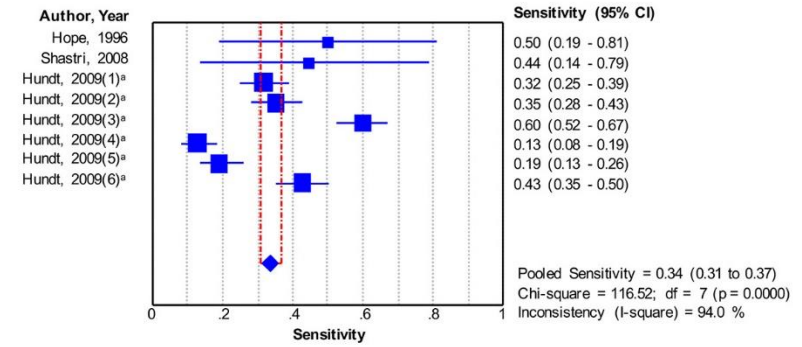

(C) quantitative iFOBT for advanced adenomas of proximal colon

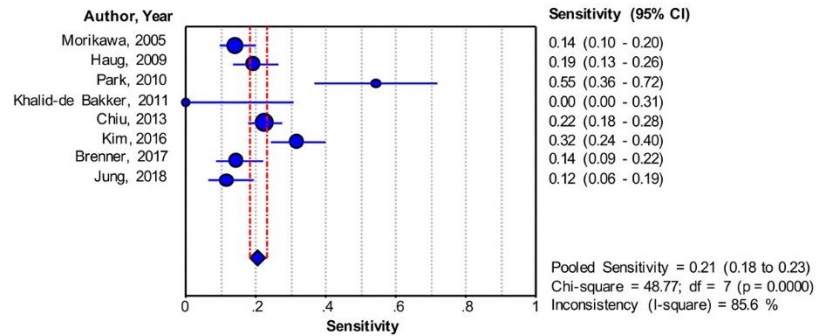

(D) quantitative iFOBT for advanced adenomas of distal colon/rectum

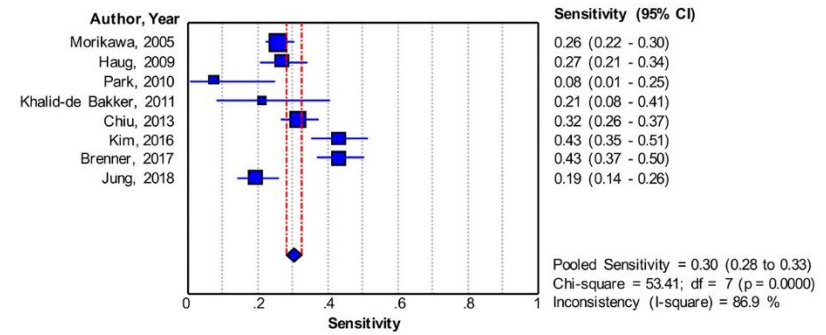

(A) qualitative iFOBT for advanced neoplasia of proximal colon

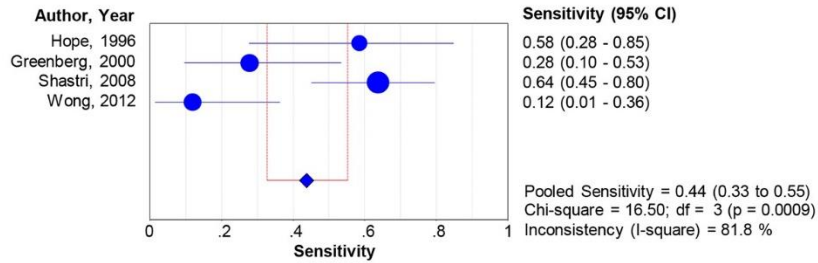

(B) qualitative iFOBT for advanced neoplasia of distal colon/rectum

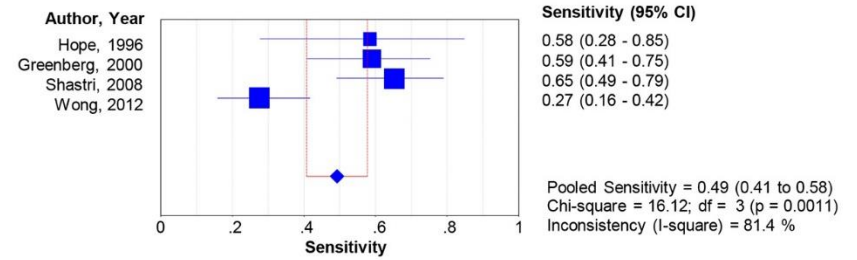

(C) quantitative iFOBT for advanced neoplasia of proximal colon

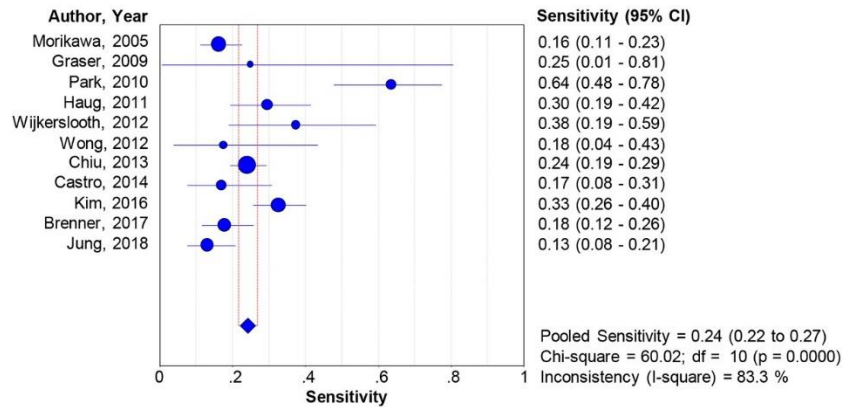

(D) quantitative iFOBT for advanced neoplasia of distal colon/rectum

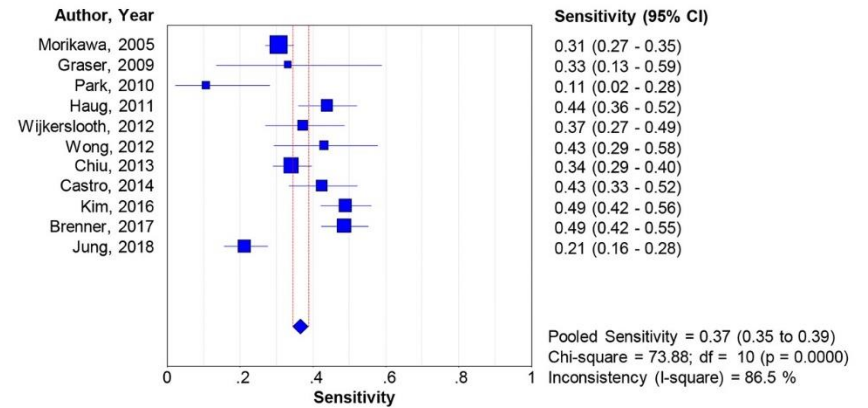

(A) iFOBT for detecting proximal colorectal cancer in clinical setting

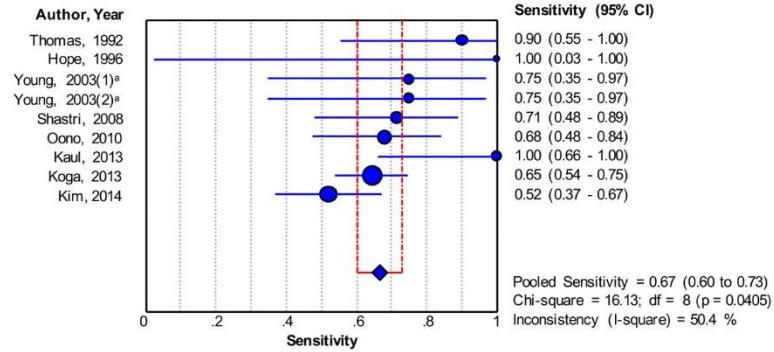

(B) iFOBT for detecting distal colorectal cancer in clinical setting

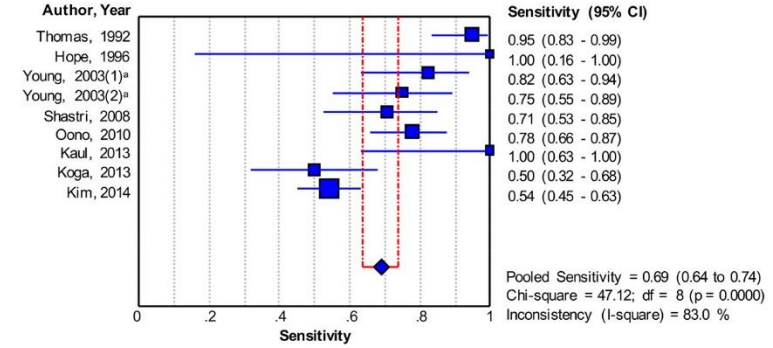

(C) iFOBT for detecting proximal colorectal cancer in screening setting

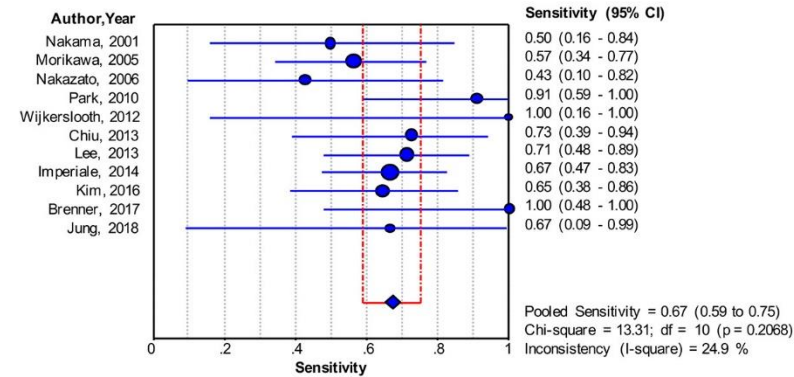

(D) iFOBT for detecting distal colorectal cancer in screening setting

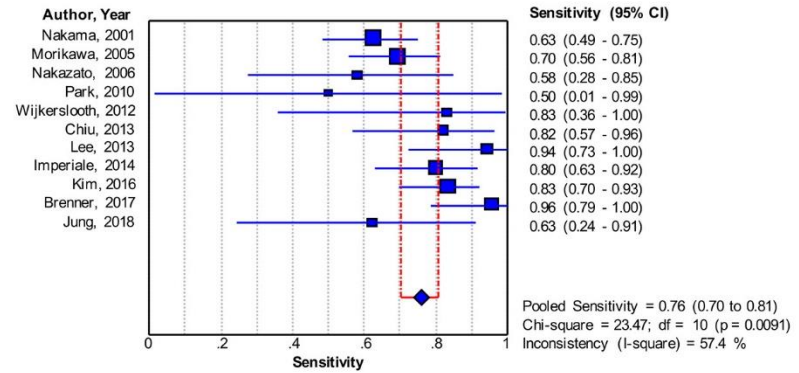

(A) iFOBT for detecting proximal advanced adenomas in screening setting

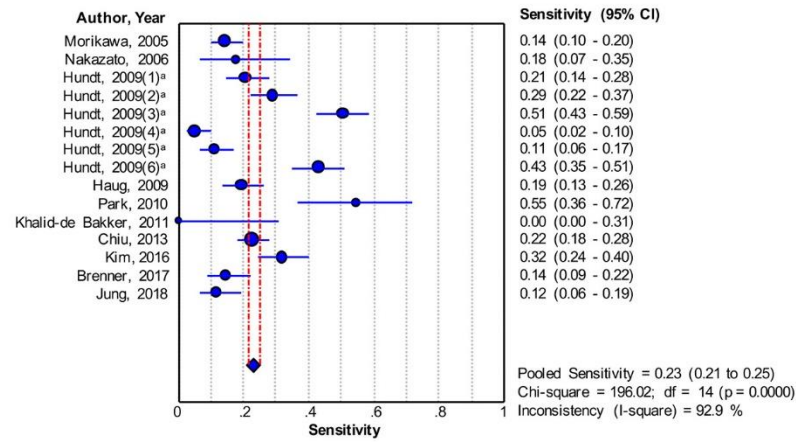

(B) iFOBT for detecting distal advanced adenomas in screening setting

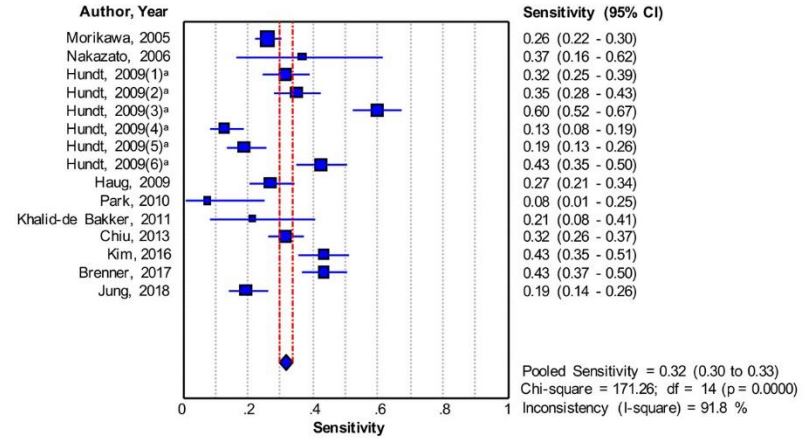

(A) iFOBT for detecting proximal advanced neoplasia in clinical setting

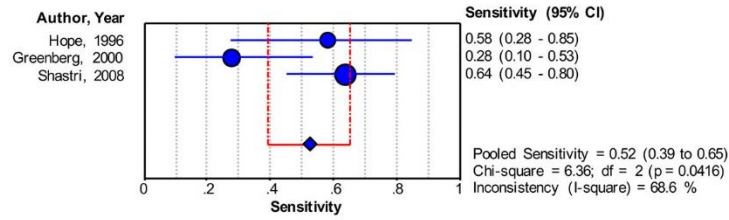

(B) iFOBT for detecting distal advanced neoplasia in clinical setting

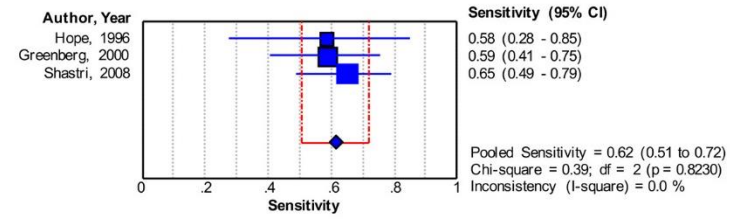

(C) iFOBT for detecting proximal advanced neoplasia in screening setting

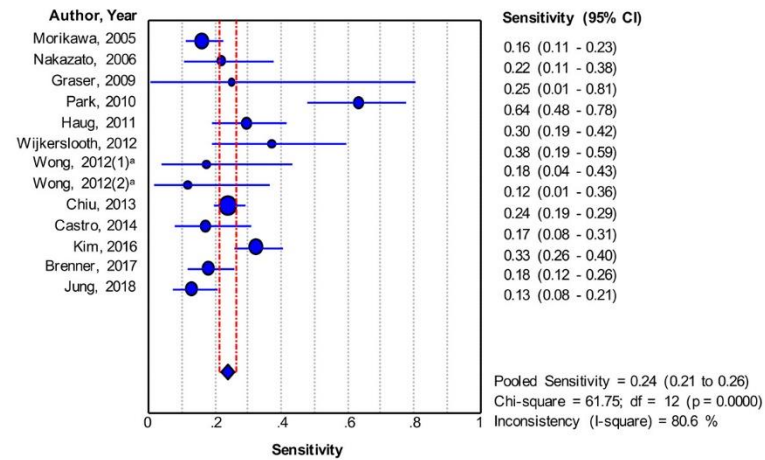

(D) iFOBT for detecting distal advanced neoplasia in screening setting

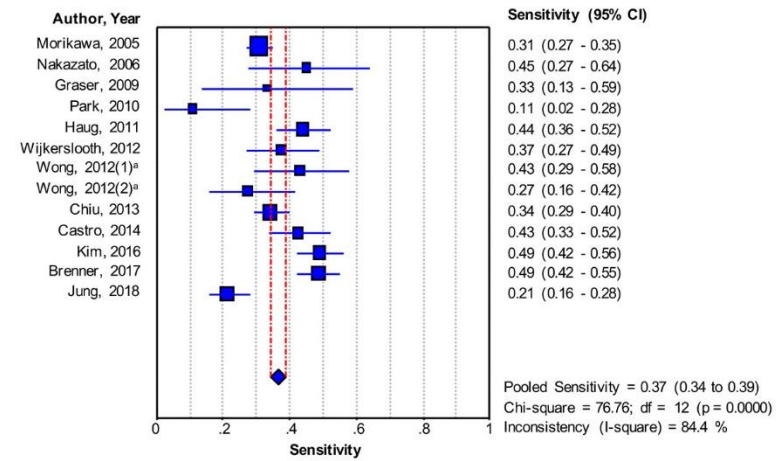



(A) for testing publication bias of detecting colorectal cancer by using guaiac-fecal occult blood test

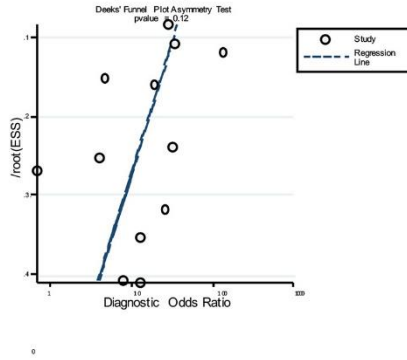

(B) for testing publication bias of detecting colorectal cancer by using immunochemical fecal occult blood test

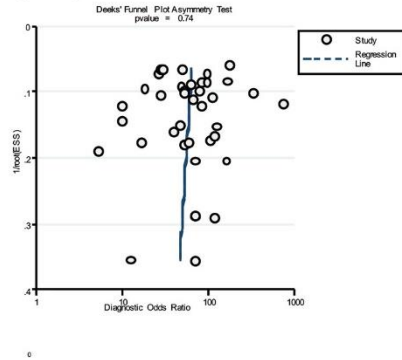

(C) for testing publication bias of detecting advanced adenoma by using guaiac-fecal occult blood test

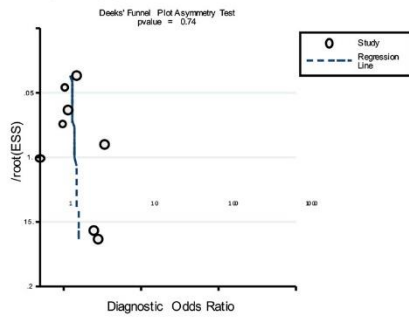

(D) for testing publication bias of detecting advanced adenoma by using immunochemical fecal occult blood test

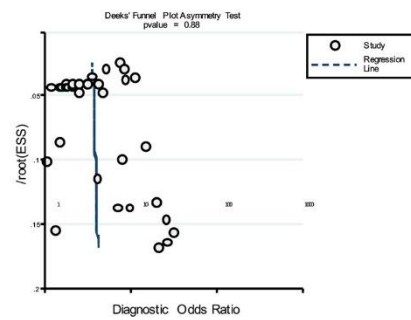

(E) for testing publication bias of detecting advanced neoplasia by using guaiac-occult blood test

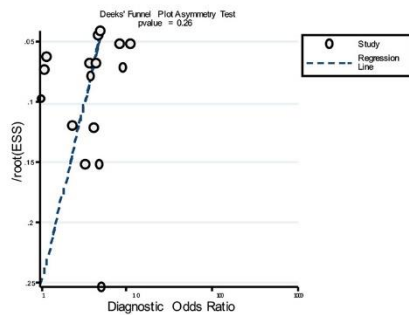

(F) for testing publication bias of detecting advanced neoplasia by using immunochemical fecal occult blood test

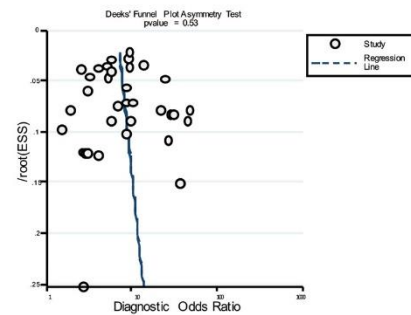

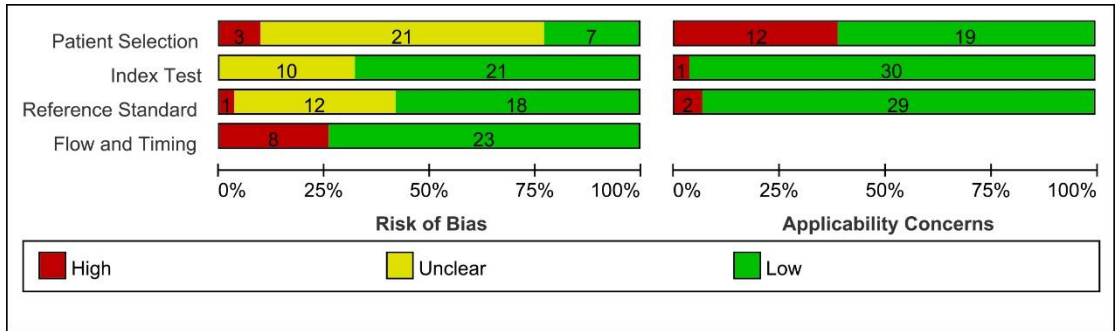

|                        | Risk of Bias      |            |                    |                 | Applicability Concerns |            |                    |
|------------------------|-------------------|------------|--------------------|-----------------|------------------------|------------|--------------------|
|                        | Patient Selection | Index Test | Reference Standard | Flow and Timing | Patient Selection      | Index Test | Reference Standard |
| Ahluquist, 2008        | ?                 | +          | +                  | +               | +                      | +          | +                  |
| Bjerregaard, 2009      | ?                 | ?          | ?                  | ●               | +                      | +          | +                  |
| Brenner, 2017          | ?                 | +          | +                  | +               | +                      | +          | +                  |
| Castro, 2015           | ?                 | +          | +                  | +               | +                      | +          | +                  |
| Chiu, 2013             | ?                 | +          | +                  | +               | +                      | +          | +                  |
| Graser, 2009           | ?                 | ?          | ?                  | ●               | +                      | +          | ●                  |
| Greenberg, 2000        | ?                 | +          | ?                  | +               | ●                      | +          | +                  |
| Haug, 2010             | ?                 | +          | +                  | +               | +                      | +          | +                  |
| Haug, 2011             | ?                 | +          | +                  | +               | +                      | +          | +                  |
| Hope, 1996             | +                 | +          | +                  | +               | ●                      | +          | +                  |
| Hundt, 2009            | ?                 | +          | +                  | +               | +                      | +          | +                  |
| Imperiale, 2014        | +                 | +          | +                  | +               | +                      | +          | +                  |
| Jung, 2018             | ?                 | ?          | ?                  | +               | +                      | +          | +                  |
| Kaul, 2013             | ?                 | +          | ●                  | ●               | ●                      | +          | ●                  |
| Khalid-de Bakker, 2011 | ?                 | ?          | ?                  | ●               | +                      | +          | +                  |
| Kim, 2014              | ●                 | +          | ?                  | ●               | ●                      | +          | +                  |
| Kim, 2016              | ?                 | ?          | +                  | +               | +                      | +          | +                  |
| Koga, 2013             | ●                 | ?          | ?                  | +               | ●                      | +          | +                  |
| Lee, 2013              | +                 | +          | ?                  | ●               | +                      | +          | +                  |
| Lieberman, 2001        | ?                 | +          | +                  | +               | +                      | +          | +                  |
| Morikawa, 2005         | +                 | +          | +                  | +               | +                      | +          | +                  |
| Nakama, 2001           | ?                 | ?          | ?                  | +               | ●                      | +          | +                  |
| Nakazato, 2006         | ?                 | ?          | ?                  | +               | +                      | ●          | +                  |
| Oono, 2010             | ?                 | ?          | ?                  | +               | ●                      | +          | +                  |
| Park, 2010             | +                 | +          | +                  | +               | ●                      | +          | +                  |
| Shastri, 2008          | +                 | +          | +                  | +               | ●                      | +          | +                  |
| Sung, 2003             | ?                 | +          | +                  | +               | +                      | +          | +                  |
| Thomas, 1992           | ?                 | ?          | ?                  | ●               | ●                      | +          | +                  |
| Wijkerslooth, 2012     | +                 | +          | +                  | +               | ●                      | +          | +                  |
| Wong, 2012             | ?                 | +          | +                  | +               | +                      | +          | +                  |
| Young, 2003            | ●                 | +          | +                  | ●               | ●                      | +          | +                  |

● High      ? Unclear      + Low

## **Protocol 1. Description of the QUADAS-2 critical appraisal checklist**

### **Domain 1. Patient selection**

#### ***Risk of bias: Could the selection of patients have introduced bias?***

Signaling question 1: Was a consecutive or random sample of patients enrolled?

- We scored “Yes” if a consecutive or random sample of eligible patients was enrolled; “No” if patients were selected by convenience; and “Unclear” if the study did not report the manner in which patients were enrolled.

Signaling question 2: Was a case-control design avoided?

- We scored “Yes” if a case-control design was avoided; “No” if the study employed a case-control design; and “Unclear” if study design was not reported.

Signaling question 3: Did the study avoid inappropriate exclusions?

- We scored “Yes” if no inappropriate exclusion was noted; “No” if inappropriate exclusions were noted such as patients were excluded because of prior knowledge about them other than their intestinal-related diseases status; “Unclear” if exclusion standards were not reported.
- We considered Risk of Bias to be “Low Risk” if we scored “Yes” for all of the three signaling questions; “High Risk” if we scored “No” for one out of the three signaling question; and “Unclear” if we scored “unclear” for one out of the three signaling question.

#### ***Concerns regarding applicability: Is there concern that the included patients do not match the review question?***

- Our study aimed to investigate the diagnostic performance of fecal occult blood test (FOBT) in detecting colorectal neoplasms by anatomical site. We judged “Low Applicability Concern” if we scored “Yes” for studies that has already excluded patients who had history of colorectal cancer, inflammatory of bowel disease, and who had history of colonoscopy in the preceding 5 years; “High Applicability Concern” if we scored “No” for studies that has not excluded patients who had history of colorectal cancer, inflammatory of bowel disease, and were at active bleeding, or who had history of colonoscopy in the preceding 5 years; and “Unclear Applicability Concern” if we could not tell.

- **Domain 2. Index Test**

***Risk of bias: Could the conduct or interpretation of the test have introduced bias?***

Signaling question 1: Were the FOBT test results interpreted without knowledge of the results of colonoscopy?

- We scored “Yes” if the FOBT test results were interpreted without knowledge of the results of colonoscopy; “No” if blinding to test results were not done; and “Unclear” if this was not stated.

Signaling question 2: If a threshold was used, was it pre-specified?

- We scored “Yes” if an FOBT cut-off value was pre-specified or it was stated that “the cut-off value as per the manufacturer’s guidelines was used”; and “No” if this was not stated.
- We considered Risk of Bias to be “Low Risk” if we scored “Yes” for both signaling questions; “High Risk” if we scored “No” for either of the questions; and “Unclear” if we were unclear about blinding status or cut-off value.

***Concerns regarding applicability: Is there concern that FOBT test, its conduct, or interpretation differ from the review question?***

- We judged “Low Applicability Concern” if interpretation of test results was blinded, threshold value was specified, and the test was performed as per the manufacturer’s guidelines. We judged “High Applicability Concern” if blinding in test result interpretation was not done, threshold value was not specified or the test was not carried out as per the manufacturer’s recommendations. We judged “Unclear Applicability Concern” if the blinding status of the study and threshold value were unclear.

### **Domain 3. Reference standard**

#### ***Risk of bias: Could the conduct or interpretation of the test have introduced bias?***

Signaling question 1: Is the reference standard likely to correctly classify the target condition?

- We scored “Yes” if diagnoses were confirmed by colonoscopy; “No” if diagnosis were not done by colonoscopy; and “Unclear” if this was not stated.

Signaling question 2: Were results of colonoscopy interpreted without knowledge of the results of FOBT test?

- We scored “Yes” if the results of colonoscopy were interpreted without knowledge of the results of FOBT test; “No” if blinding to test results were not done; and “Unclear” if this was not stated.

#### ***Concerns regarding applicability: Is there concern that TST test, its conduct, or interpretation differ from the review question?***

- We judged “Low Applicability Concern” if interpretation of test results was blinded and diagnoses were referred to colonoscopy. We judged “High Applicability Concern” if blinding in test result interpretation was not done or diagnoses were not confirmed by colonoscopy. We judged “Unclear Applicability Concern” if the blinding status of the study and diagnosis tests were unclear.

## **Domain 4. Flow and timing**

### ***Risk of bias: Could the patient flow have introduced bias?***

Signaling question 1: Did all patients received a reference standard?

We scored “Yes” if the all patients received a reference standard; “No” if not all of patients received a reference standard

Signaling question 2: Were all patients included in the analysis?

We scored “Yes” if all patients included in the analysis; “No” if not all of patients included in the study.
